# Supplementary material for: Comprehensively prognostic and immunological analysis of VRK Serine/Threonine Kinase 1 in pan-cancer and identification in hepatocellular carcinoma
Source: publisher site journal article supplement (doi:10.18632/aging.205389), 2023-12-28
Supplement: Supplementary file [file aging-v15i24-205389-supplementary-material-SD1.pdf]

**SUPPLEMENTARY FIGURE**

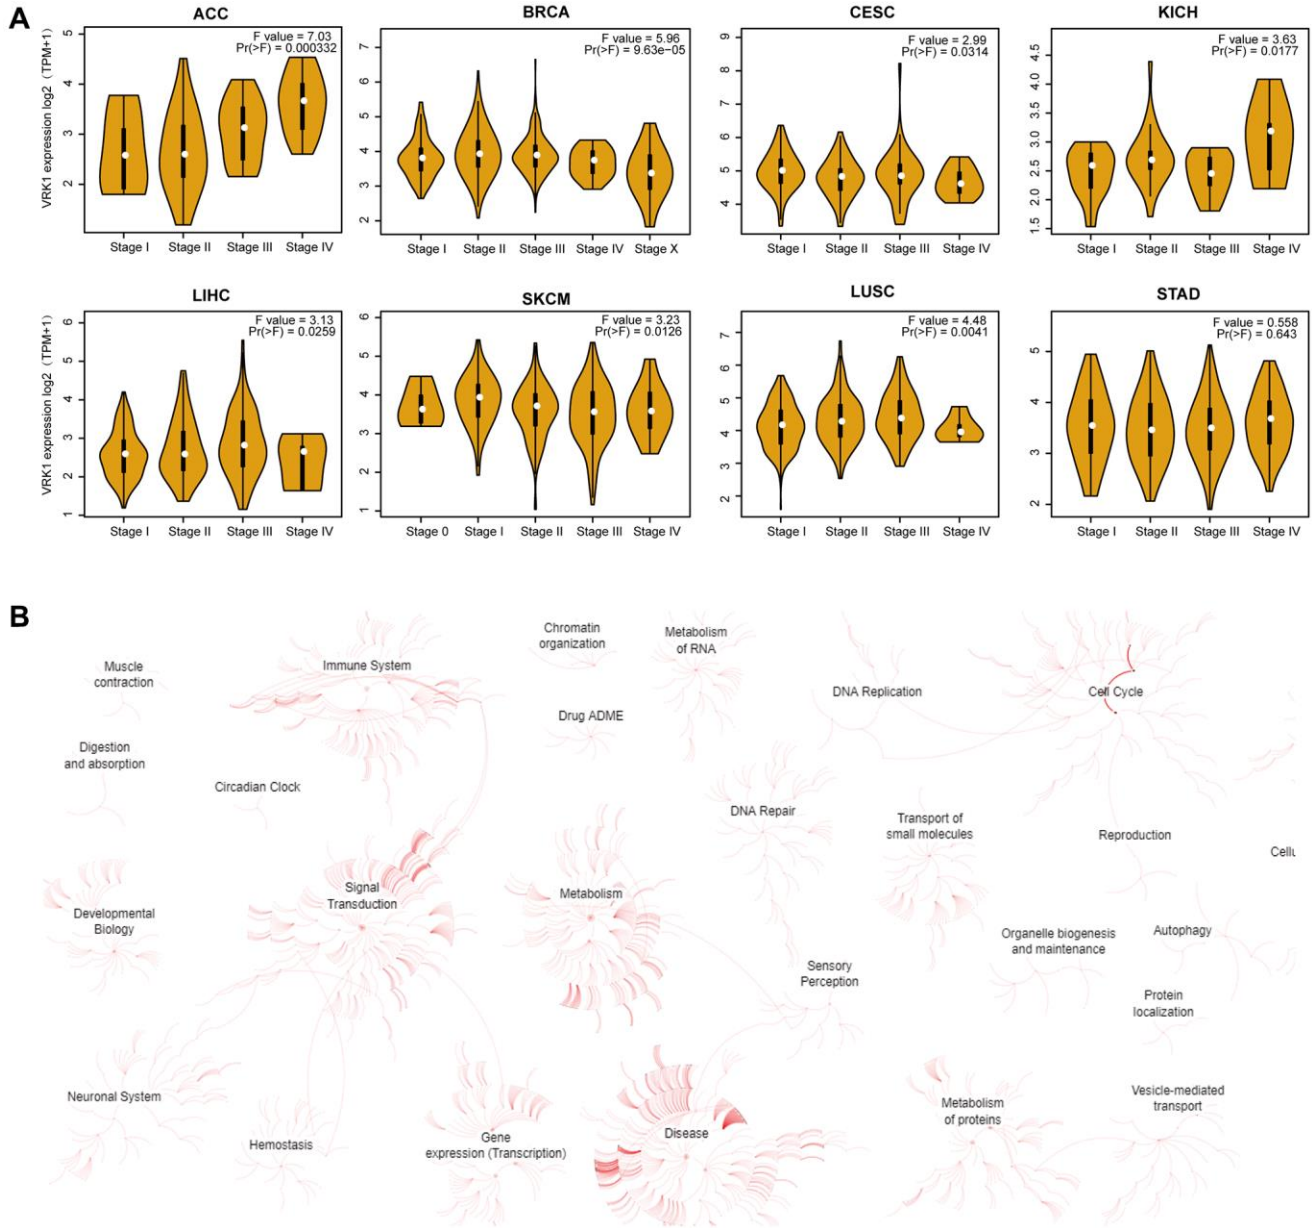

**Supplementary Figure 1.** (A) Violin plots showing differential VRK1 expression levels between pathological stages in various cancers. (B) Pathway analysis for genes co-expressed with VRK1 using Reactome. Pink depicts pathways containing genes co-expressed with VRK1.
